# Supplementary material for: Every Fifth Individual With Type 1 Diabetes Suffers From an Additional Autoimmune Disease: A Finnish Nationwide Study
Source: Oxford University Press journal article supplement (doi:10.2337/dc19-2429), 2020-03-05
Supplement: dc192429supplementarydata.pdf [file dc192429supplementarydata.pdf]

SUPPLEMENTARY DATA

**Supplementary Table 1.** Specific codes used in the identification of autoimmune diseases

| Disease                    | Finnish Care Register for Health Care (ICD) *                               | Drug Prescription Register (ATC) **      | Drug Reimbursement Register **                | National Health Insurance Dietary Grant Register*** |
|----------------------------|-----------------------------------------------------------------------------|------------------------------------------|-----------------------------------------------|-----------------------------------------------------|
| Autoimmune hypothyroidism  | ICD-8: 24400,24409<br>ICD-9: 2452A,2458X,2459X<br>ICD10: E0380, E0389, E039 | H03AA01<br>H03AA02<br>H03AA03<br>H03AA05 | 104 together with ICD-10 code E03, E038, E039 |                                                     |
| Autoimmune hyperthyroidism | ICD-8: 24200, 24209<br>ICD-9: 2420A<br>ICD-10: E050                         | H03BB01<br>H03BA02                       | -                                             |                                                     |
| Addison's disease          | ICD-8: 25510<br>ICD-9: 2554A<br>ICD-10: E271, E272                          | -                                        | 105 together with ICD-10 code E271            |                                                     |
| Celiac disease             | ICD-8: -<br>ICD-9: 5790A<br>ICD-10: K900                                    | -                                        |                                               | Reimbursement for gluten-free diet                  |
| Atrophic gastritis         | ICD-8: -<br>ICD-9: 5351X                                                    | -                                        | -                                             |                                                     |

SUPPLEMENTARY DATA

|                     |                                         |   |                                   |  |
|---------------------|-----------------------------------------|---|-----------------------------------|--|
|                     | ICD-10: K294                            |   |                                   |  |
| Thyroid cancer **** | ICD-8: 193<br>ICD-9: 193<br>ICD-10: C73 | - | 104 together with ICD-10 code C73 |  |

\*Maintained by the Finnish National Institute for Health and Welfare since 1970 and containing information of all disease codes and procedure codes (since 1994) from inpatient discharges, and specialized outpatient care.

\*\*Maintained by The National Social Insurance Institution since 1994 and containing information of all prescribed, purchased and reimbursed medications in outpatient care. Medications were coded according to the Anatomic Therapeutic Chemical (ATC) classification.

\*\*\* Maintained by The National Social Insurance Institution for the years 2002-2015.

\*\*\*\* Thyroid cancer was used to identify and exclude non-autoimmune individuals with thyroid disease.

## SUPPLEMENTARY DATA

### The Finnish Diabetic Nephropathy Study Centers

|                                                                                         |                                                                                                                                                                                                                                                                                                                                                                                                                                                                                                                                                                                                                                                                                                                                                                                                                                                                                                                                                                                                                                                                                                                                                                                                                                                                                                                                                                                                                                                                                                                                                                                                                      |
|-----------------------------------------------------------------------------------------|----------------------------------------------------------------------------------------------------------------------------------------------------------------------------------------------------------------------------------------------------------------------------------------------------------------------------------------------------------------------------------------------------------------------------------------------------------------------------------------------------------------------------------------------------------------------------------------------------------------------------------------------------------------------------------------------------------------------------------------------------------------------------------------------------------------------------------------------------------------------------------------------------------------------------------------------------------------------------------------------------------------------------------------------------------------------------------------------------------------------------------------------------------------------------------------------------------------------------------------------------------------------------------------------------------------------------------------------------------------------------------------------------------------------------------------------------------------------------------------------------------------------------------------------------------------------------------------------------------------------|
| Anjalankoski Health Center                                                              | S.Koivula, T.Uggeldahl                                                                                                                                                                                                                                                                                                                                                                                                                                                                                                                                                                                                                                                                                                                                                                                                                                                                                                                                                                                                                                                                                                                                                                                                                                                                                                                                                                                                                                                                                                                                                                                               |
| Central Finland Central Hospital, Jyväskylä                                             | T.Forslund, A.Halonen, A.Koistinen, P.Koskiahio,<br>M.Laukkanen, J.Saltevo, M.Tiihonen                                                                                                                                                                                                                                                                                                                                                                                                                                                                                                                                                                                                                                                                                                                                                                                                                                                                                                                                                                                                                                                                                                                                                                                                                                                                                                                                                                                                                                                                                                                               |
| Central Hospital of Åland Islands, Mariehamn                                            | M.Forsen, H.Granlund, A.-C.Jonsson, B.Nyroos                                                                                                                                                                                                                                                                                                                                                                                                                                                                                                                                                                                                                                                                                                                                                                                                                                                                                                                                                                                                                                                                                                                                                                                                                                                                                                                                                                                                                                                                                                                                                                         |
| Central Hospital of Kanta-Häme, Hämeenlinna                                             | P.Kinnunen, A.Orvola, T.Salonen, A.Vähänen                                                                                                                                                                                                                                                                                                                                                                                                                                                                                                                                                                                                                                                                                                                                                                                                                                                                                                                                                                                                                                                                                                                                                                                                                                                                                                                                                                                                                                                                                                                                                                           |
| Central Hospital of Kymenlaakso, Kotka                                                  | R.Paldanius, M.Riihelä, L.Ryysy                                                                                                                                                                                                                                                                                                                                                                                                                                                                                                                                                                                                                                                                                                                                                                                                                                                                                                                                                                                                                                                                                                                                                                                                                                                                                                                                                                                                                                                                                                                                                                                      |
| Central Hospital of Länsi-Pohja, Kemi                                                   | H.Laukkanen, P.Nyländen, A.Sademies                                                                                                                                                                                                                                                                                                                                                                                                                                                                                                                                                                                                                                                                                                                                                                                                                                                                                                                                                                                                                                                                                                                                                                                                                                                                                                                                                                                                                                                                                                                                                                                  |
| Central Ostrobothnian Hospital District, Kokkola                                        | S.Anderson, B.Asplund, U.Byskata, P.Liedes,<br>M.Kuusela, T.Virkkala                                                                                                                                                                                                                                                                                                                                                                                                                                                                                                                                                                                                                                                                                                                                                                                                                                                                                                                                                                                                                                                                                                                                                                                                                                                                                                                                                                                                                                                                                                                                                 |
| City of Espoo Health Center:                                                            |                                                                                                                                                                                                                                                                                                                                                                                                                                                                                                                                                                                                                                                                                                                                                                                                                                                                                                                                                                                                                                                                                                                                                                                                                                                                                                                                                                                                                                                                                                                                                                                                                      |
| Espoonlahti                                                                             | A.Nikkola, E.Ritola                                                                                                                                                                                                                                                                                                                                                                                                                                                                                                                                                                                                                                                                                                                                                                                                                                                                                                                                                                                                                                                                                                                                                                                                                                                                                                                                                                                                                                                                                                                                                                                                  |
| Tapiola                                                                                 | M.Niska, H.Saarinen                                                                                                                                                                                                                                                                                                                                                                                                                                                                                                                                                                                                                                                                                                                                                                                                                                                                                                                                                                                                                                                                                                                                                                                                                                                                                                                                                                                                                                                                                                                                                                                                  |
| Samaria                                                                                 | E.Oukko-Ruponen, T.Virtanen                                                                                                                                                                                                                                                                                                                                                                                                                                                                                                                                                                                                                                                                                                                                                                                                                                                                                                                                                                                                                                                                                                                                                                                                                                                                                                                                                                                                                                                                                                                                                                                          |
| Vierlaakso                                                                              | A.Lyytinen                                                                                                                                                                                                                                                                                                                                                                                                                                                                                                                                                                                                                                                                                                                                                                                                                                                                                                                                                                                                                                                                                                                                                                                                                                                                                                                                                                                                                                                                                                                                                                                                           |
| City of Helsinki Health Center:                                                         |                                                                                                                                                                                                                                                                                                                                                                                                                                                                                                                                                                                                                                                                                                                                                                                                                                                                                                                                                                                                                                                                                                                                                                                                                                                                                                                                                                                                                                                                                                                                                                                                                      |
| Puistola                                                                                | H.Kari, T.Simonen                                                                                                                                                                                                                                                                                                                                                                                                                                                                                                                                                                                                                                                                                                                                                                                                                                                                                                                                                                                                                                                                                                                                                                                                                                                                                                                                                                                                                                                                                                                                                                                                    |
| Suutarila                                                                               | A.Kaprio, J.Kärkkäinen, B.Rantaeskola                                                                                                                                                                                                                                                                                                                                                                                                                                                                                                                                                                                                                                                                                                                                                                                                                                                                                                                                                                                                                                                                                                                                                                                                                                                                                                                                                                                                                                                                                                                                                                                |
| Töölö                                                                                   | P.Kääriäinen, J.Haaga, A-L.Pietiläinen                                                                                                                                                                                                                                                                                                                                                                                                                                                                                                                                                                                                                                                                                                                                                                                                                                                                                                                                                                                                                                                                                                                                                                                                                                                                                                                                                                                                                                                                                                                                                                               |
| City of Hyvinkää Health Center                                                          | S.Klemetti, T.Nyandoto, E.Rontu, S.Satuli-Autere                                                                                                                                                                                                                                                                                                                                                                                                                                                                                                                                                                                                                                                                                                                                                                                                                                                                                                                                                                                                                                                                                                                                                                                                                                                                                                                                                                                                                                                                                                                                                                     |
| City of Vantaa Health Center:                                                           |                                                                                                                                                                                                                                                                                                                                                                                                                                                                                                                                                                                                                                                                                                                                                                                                                                                                                                                                                                                                                                                                                                                                                                                                                                                                                                                                                                                                                                                                                                                                                                                                                      |
| Korso                                                                                   | R.Toivonen, H.Virtanen                                                                                                                                                                                                                                                                                                                                                                                                                                                                                                                                                                                                                                                                                                                                                                                                                                                                                                                                                                                                                                                                                                                                                                                                                                                                                                                                                                                                                                                                                                                                                                                               |
| Länsimäki                                                                               | R.Ahonen, M.Ivaska-Suomela, A.Jauhiainen                                                                                                                                                                                                                                                                                                                                                                                                                                                                                                                                                                                                                                                                                                                                                                                                                                                                                                                                                                                                                                                                                                                                                                                                                                                                                                                                                                                                                                                                                                                                                                             |
| Martinlaakso                                                                            | M.Laine, T.Pellonpää, R.Puranen                                                                                                                                                                                                                                                                                                                                                                                                                                                                                                                                                                                                                                                                                                                                                                                                                                                                                                                                                                                                                                                                                                                                                                                                                                                                                                                                                                                                                                                                                                                                                                                      |
| Myyrämäki                                                                               | A.Airas, J.Laakso, K.Rautavaara                                                                                                                                                                                                                                                                                                                                                                                                                                                                                                                                                                                                                                                                                                                                                                                                                                                                                                                                                                                                                                                                                                                                                                                                                                                                                                                                                                                                                                                                                                                                                                                      |
| Rekola                                                                                  | M.Erola, E.Jatkola                                                                                                                                                                                                                                                                                                                                                                                                                                                                                                                                                                                                                                                                                                                                                                                                                                                                                                                                                                                                                                                                                                                                                                                                                                                                                                                                                                                                                                                                                                                                                                                                   |
| Tikkurila                                                                               | R.Lönnblad, A.Malm, J.Mäkelä, E.Rautamo                                                                                                                                                                                                                                                                                                                                                                                                                                                                                                                                                                                                                                                                                                                                                                                                                                                                                                                                                                                                                                                                                                                                                                                                                                                                                                                                                                                                                                                                                                                                                                              |
| Heinola Health Center                                                                   | P.Hentunen, J.Lagerstam                                                                                                                                                                                                                                                                                                                                                                                                                                                                                                                                                                                                                                                                                                                                                                                                                                                                                                                                                                                                                                                                                                                                                                                                                                                                                                                                                                                                                                                                                                                                                                                              |
| Helsinki University Central Hospital, Department of<br>Medicine, Division of Nephrology | A.Ahola, M.Feodoroff, D.Gordin, O.Heikkilä, K.Hietala, M.Korolainen, J.Kytö,<br>S.Lindh, K.Pettersson-Fernholm, A.Sandelin, L.Thorn, J.Tuomikangas, T.Vesisenaho,<br>J.Wadén<br>V.Sipilä<br>T.Kalliomäki, J.Koskelainen, R.Nikkanen,<br>N.Savolainen, H.Sulonen, E.Valtonen<br>L. Norvio, A. Hämäläinen<br>E.Toivanen<br>A.Parta, I.Pirttiniemi<br>S.Aranko, S.Ervasti, R.Kauppinen-Mäkelin,<br>A.Kuusisto, T.Lepplä, K.Nikkilä, L.Pekkonen<br>K.Nuorva, M.Tiihonen<br>S.Jokelainen, K.Kananen, M.Karjalainen, P.Kemppainen, A-M.Mankinen, A.Reponen<br>M.Sankari<br>H.Stuckey, P.Suominen<br>A.Lappalainen, M.Liimatainen, J.Santaholma<br>A.Aimolahti, E.Huovinen<br>V.Ilkka, M.Lehtimäki<br>E.Pälkkö-Kontinen, A.Vanhanen<br>E.Koskinen, T.Siitonen<br>E.Huttunen, R.Ikäheimo, P.Karhapää, P.Kekäläinen,<br>M.Laakso, T.Lakka, E.Lampainen, L.Moilanen,<br>L.Niskanen, U.Tuovinen, I.Vauhkonen, E.Voutilainen<br>T.Kääriäinen, E.Isopoussu<br>E.Kilki, I.Koskinen, L.Riihelä<br>T.Meriläinen, P.Poukka, R.Savolainen, N.Uhlenius<br>A.Mäkelä, M.Tanner<br>L.Hyvärinen, K.Lampela, S.Pöykkö, T.Rompasaari, S.Severinkangas, T.Tulokas<br>P. Erola, L. Härkönen, P.Linkola, I.Pulli, E.Repo<br>T.Granlund, K.Hietanen, M.Porrassalmi, M.Saari, T.Salonen, M.Tiikkainen,<br>I.-M.Jousmaa, J.Rinne<br>A.Mäkelä, P.Eloranta<br>H.Lanki, S.Moilanen, M.Tilly-Kiesi<br>A.Gynther, R.Manninen, P.Nironen, M.Salminen,<br>T.Vänttinen<br>I.Pirttiniemi, A-M.Hänninen<br>U-M.Henttula, P.Kekäläinen, M.Pietarinen,<br>A.Rissanen, M.Voutilainen<br>A.Burgos, K.Urtamo<br>E.Jokelainen, P-L.Jylkkä, E.Kaarlela, J.Vuolaspuro |
| Herttoniemi Hospital, Helsinki                                                          |                                                                                                                                                                                                                                                                                                                                                                                                                                                                                                                                                                                                                                                                                                                                                                                                                                                                                                                                                                                                                                                                                                                                                                                                                                                                                                                                                                                                                                                                                                                                                                                                                      |
| Hospital of Lounais-Häme, Forssa                                                        |                                                                                                                                                                                                                                                                                                                                                                                                                                                                                                                                                                                                                                                                                                                                                                                                                                                                                                                                                                                                                                                                                                                                                                                                                                                                                                                                                                                                                                                                                                                                                                                                                      |
| Hyvinkää Hospital                                                                       |                                                                                                                                                                                                                                                                                                                                                                                                                                                                                                                                                                                                                                                                                                                                                                                                                                                                                                                                                                                                                                                                                                                                                                                                                                                                                                                                                                                                                                                                                                                                                                                                                      |
| Iisalmi Hospital                                                                        |                                                                                                                                                                                                                                                                                                                                                                                                                                                                                                                                                                                                                                                                                                                                                                                                                                                                                                                                                                                                                                                                                                                                                                                                                                                                                                                                                                                                                                                                                                                                                                                                                      |
| Jokilaakso Hospital, Jämsä                                                              |                                                                                                                                                                                                                                                                                                                                                                                                                                                                                                                                                                                                                                                                                                                                                                                                                                                                                                                                                                                                                                                                                                                                                                                                                                                                                                                                                                                                                                                                                                                                                                                                                      |
| Jorvi Hospital, Helsinki University Central Hospital                                    |                                                                                                                                                                                                                                                                                                                                                                                                                                                                                                                                                                                                                                                                                                                                                                                                                                                                                                                                                                                                                                                                                                                                                                                                                                                                                                                                                                                                                                                                                                                                                                                                                      |
| Jyväskylä Health Center, Kyllö                                                          |                                                                                                                                                                                                                                                                                                                                                                                                                                                                                                                                                                                                                                                                                                                                                                                                                                                                                                                                                                                                                                                                                                                                                                                                                                                                                                                                                                                                                                                                                                                                                                                                                      |
| Kainuu Central Hospital, Kajaani                                                        |                                                                                                                                                                                                                                                                                                                                                                                                                                                                                                                                                                                                                                                                                                                                                                                                                                                                                                                                                                                                                                                                                                                                                                                                                                                                                                                                                                                                                                                                                                                                                                                                                      |
| Kerava Health Center                                                                    |                                                                                                                                                                                                                                                                                                                                                                                                                                                                                                                                                                                                                                                                                                                                                                                                                                                                                                                                                                                                                                                                                                                                                                                                                                                                                                                                                                                                                                                                                                                                                                                                                      |
| Kirkkonummi Health Center                                                               |                                                                                                                                                                                                                                                                                                                                                                                                                                                                                                                                                                                                                                                                                                                                                                                                                                                                                                                                                                                                                                                                                                                                                                                                                                                                                                                                                                                                                                                                                                                                                                                                                      |
| Kivelä Hospital, Helsinki                                                               |                                                                                                                                                                                                                                                                                                                                                                                                                                                                                                                                                                                                                                                                                                                                                                                                                                                                                                                                                                                                                                                                                                                                                                                                                                                                                                                                                                                                                                                                                                                                                                                                                      |
| Koskela Hospital, Helsinki                                                              |                                                                                                                                                                                                                                                                                                                                                                                                                                                                                                                                                                                                                                                                                                                                                                                                                                                                                                                                                                                                                                                                                                                                                                                                                                                                                                                                                                                                                                                                                                                                                                                                                      |
| Kotka Health Center                                                                     |                                                                                                                                                                                                                                                                                                                                                                                                                                                                                                                                                                                                                                                                                                                                                                                                                                                                                                                                                                                                                                                                                                                                                                                                                                                                                                                                                                                                                                                                                                                                                                                                                      |
| Kouvola Health Center                                                                   |                                                                                                                                                                                                                                                                                                                                                                                                                                                                                                                                                                                                                                                                                                                                                                                                                                                                                                                                                                                                                                                                                                                                                                                                                                                                                                                                                                                                                                                                                                                                                                                                                      |
| Kuopio University Hospital                                                              |                                                                                                                                                                                                                                                                                                                                                                                                                                                                                                                                                                                                                                                                                                                                                                                                                                                                                                                                                                                                                                                                                                                                                                                                                                                                                                                                                                                                                                                                                                                                                                                                                      |
| Kuusamo Health Center                                                                   |                                                                                                                                                                                                                                                                                                                                                                                                                                                                                                                                                                                                                                                                                                                                                                                                                                                                                                                                                                                                                                                                                                                                                                                                                                                                                                                                                                                                                                                                                                                                                                                                                      |
| Kuusankoski Hospital                                                                    |                                                                                                                                                                                                                                                                                                                                                                                                                                                                                                                                                                                                                                                                                                                                                                                                                                                                                                                                                                                                                                                                                                                                                                                                                                                                                                                                                                                                                                                                                                                                                                                                                      |
| Laakso Hospital, Helsinki                                                               |                                                                                                                                                                                                                                                                                                                                                                                                                                                                                                                                                                                                                                                                                                                                                                                                                                                                                                                                                                                                                                                                                                                                                                                                                                                                                                                                                                                                                                                                                                                                                                                                                      |
| Lahti City Hospital                                                                     |                                                                                                                                                                                                                                                                                                                                                                                                                                                                                                                                                                                                                                                                                                                                                                                                                                                                                                                                                                                                                                                                                                                                                                                                                                                                                                                                                                                                                                                                                                                                                                                                                      |
| Lapland Central Hospital, Rovaniemi                                                     |                                                                                                                                                                                                                                                                                                                                                                                                                                                                                                                                                                                                                                                                                                                                                                                                                                                                                                                                                                                                                                                                                                                                                                                                                                                                                                                                                                                                                                                                                                                                                                                                                      |
| Lappeenranta Health Center                                                              |                                                                                                                                                                                                                                                                                                                                                                                                                                                                                                                                                                                                                                                                                                                                                                                                                                                                                                                                                                                                                                                                                                                                                                                                                                                                                                                                                                                                                                                                                                                                                                                                                      |
| Lohja Hospital                                                                          |                                                                                                                                                                                                                                                                                                                                                                                                                                                                                                                                                                                                                                                                                                                                                                                                                                                                                                                                                                                                                                                                                                                                                                                                                                                                                                                                                                                                                                                                                                                                                                                                                      |
| Länsi-Uusimaa Hospital, Tammisaari                                                      |                                                                                                                                                                                                                                                                                                                                                                                                                                                                                                                                                                                                                                                                                                                                                                                                                                                                                                                                                                                                                                                                                                                                                                                                                                                                                                                                                                                                                                                                                                                                                                                                                      |
| Loimaa Health Center                                                                    |                                                                                                                                                                                                                                                                                                                                                                                                                                                                                                                                                                                                                                                                                                                                                                                                                                                                                                                                                                                                                                                                                                                                                                                                                                                                                                                                                                                                                                                                                                                                                                                                                      |
| Malmi Hospital, Helsinki                                                                |                                                                                                                                                                                                                                                                                                                                                                                                                                                                                                                                                                                                                                                                                                                                                                                                                                                                                                                                                                                                                                                                                                                                                                                                                                                                                                                                                                                                                                                                                                                                                                                                                      |
| Mikkeli Central Hospital                                                                |                                                                                                                                                                                                                                                                                                                                                                                                                                                                                                                                                                                                                                                                                                                                                                                                                                                                                                                                                                                                                                                                                                                                                                                                                                                                                                                                                                                                                                                                                                                                                                                                                      |
| Mänttä Regional Hospital                                                                |                                                                                                                                                                                                                                                                                                                                                                                                                                                                                                                                                                                                                                                                                                                                                                                                                                                                                                                                                                                                                                                                                                                                                                                                                                                                                                                                                                                                                                                                                                                                                                                                                      |
| North Karelian Hospital, Joensuu                                                        |                                                                                                                                                                                                                                                                                                                                                                                                                                                                                                                                                                                                                                                                                                                                                                                                                                                                                                                                                                                                                                                                                                                                                                                                                                                                                                                                                                                                                                                                                                                                                                                                                      |
| Nurmijärvi Health Center                                                                |                                                                                                                                                                                                                                                                                                                                                                                                                                                                                                                                                                                                                                                                                                                                                                                                                                                                                                                                                                                                                                                                                                                                                                                                                                                                                                                                                                                                                                                                                                                                                                                                                      |
| Oulaskangas Hospital, Oulainen                                                          |                                                                                                                                                                                                                                                                                                                                                                                                                                                                                                                                                                                                                                                                                                                                                                                                                                                                                                                                                                                                                                                                                                                                                                                                                                                                                                                                                                                                                                                                                                                                                                                                                      |

## SUPPLEMENTARY DATA

Oulu Health Center  
Oulu University Hospital  
Päijät-Häme Central Hospital

Palokka Health Center  
Pieksämäki Hospital

Pietarsaari Hospital  
Pori City Hospital  
Porvoo Hospital

Raahe Hospital  
Rauma Hospital  
Riihimäki Hospital  
Salo Hospital  
Satakunta Central Hospital, Pori

Savonlinna Central Hospital

Seinäjoen Central Hospital

South Karelia Central Hospital, Lappeenranta  
Tampere Health Center

Tampere University Hospital

Tiirismaa Health Center, Hollola  
Turku Health Center  
Turku University Central Hospital

Vaajakoski Health Center  
Valkeakoski Regional Hospital

Vammala Regional Hospital  
Vasa Central Hospital

L.Hiltunen, R.Häkkinen, S.Keinänen-Kiukaanniemi  
R.Ikäheimo

H.Haapamäki, A.Helanterä, S.Hämäläinen,  
V.Ilvesmäki, H.Miettinen

P.Sopanen, L.Welling

V.Sevtsenko, M.Tamminen

M-L.Holmbäck, B.Isomaa, L.Sarelin

P.Ahonen, P.Merisalo, E.Muurinen, K.Sävelä

M.Kallio, B.Rask, S.Rämö

A.Holma, M.Honkala, A.Tuomivaara, R.Vainionpää

K.Laine, K.Saarinen, T.Salminen

P.Aalto, E.Immonen, L.Juurinen

A.Alanko, J.Lapinleimu, P.Rautio, M.Virtanen

M.Asola, M.Juhola, P.Kunelius, M-L.Lahdenmäki,

P.Pääkkönen, M.Rautavirta

T.Pulli, P.Sallinen, M.Taskinen, E.Tolvanen, T.Tuominen

H.Valtonen, A.Vartia, S-L.Viitanen

O.Antila, E.Korpi-Hyövälti, T.Latvala, E.Leijala, T.Leikkari, M.Punkari N.Rantamäki,  
H.Vähävuori

T.Ensala, E.Hussi, R.Härkönen, U.Nyholm, J.Toivanen

A.Vaden, P.Alarotu, E.Kujansuu, H.Kirkkopelto-Jokinen,

M.Helin, S.Gummerus, L.Caloniuss, T.Niskanen, T.Kaitala,

T.Vatanen

I.Ala-Houhala, R.Kannisto, T.Kuningas, P.Lampinen, M.Määttä,

H.Oksala, T.Oksanen, A.Putila, H.Saha, K.Salonen, H.Tauriainen,

S.Tulokas

T.Kivelä, L.Petlin, L.Savolainen

A.Artukka, I.Hämäläinen, L.Lehtinen, E.Pyysalo, H.Virtamo, M.Viinikkala, M.Vähätalo

K.Breitholz, R.Eskola, K.Metsärinne, U.Pietilä,

P.Saarinen, R.Tuominen, S.Äyräpää

K.Mäkinen, P.Sopanen

S.Ojanen, E.Valtonen, H.Ylönen, M.Rautiainen,

T.Immonen

I.Isomäki, R.Kroneld, L.Mustaniemi, M.Tapiolinna-Mäkelä

S.Bergkulla, U.Hautamäki, V-A.Myllyniemi, I.Rusk
